# Supplementary material for: Effect of Age on Innate and Adaptive Immunity in Hospitalized COVID-19 Patients
Source: MDPI journal article supplement (doi:10.3390/jcm10204798), 2021-10-19
Supplement: s1 [file s1]

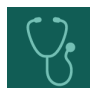

**Table S1.** SARS-CoV-2 Lineages.

| SARS-CoV-2 Linages | <65 years (n = 50) | >65 years (n = 51) |
|--------------------|--------------------|--------------------|
| B.1                | 8 (16%)            | 8 (15.6%)          |
| B.1.160            | 2 (4%)             | 6 (11.7%)          |
| B.1.258            | 3 (6%)             | 7 (13.7%)          |
| B.1.1.288          | 6 (12%)            | 4 (7.8%)           |
| B.1.343            | 5 (10%)            | 3 (5.8%)           |
| B.1.1.7            | 1 (2%)             | 1 (1.9%)           |
| B.1.177            | 25 (50%)           | 14 (27.4 %)        |
| B.1.179            | 0 (0%)             | 8 (15.6%)          |

**Table S2.** List of antibodies, companies, and identifiers.

| Antibodies         | SOURCE          | IDENTIFIER                        |
|--------------------|-----------------|-----------------------------------|
| Anti-CD14          | BD Biosciences  | Cat: 557742; RRID: AB_396848      |
| Anti-CCR2          | Biolegend       | Cat: 357208; RRID: AB_2562239     |
| Anti-CD47          | Biolegend       | Cat: 323126; RRID: AB_2716205     |
| Fixable Near IR    | Thermo Fisher   | Cat: L10119; RRID:                |
| Anti-CD169         | BD Biosciences  | Cat: 750364; RRID: AB_2874539     |
| Anti-CD40          | Biolegend       | Cat: 334332; RRID: AB_2564211     |
| Anti-Lin Cocktail  | Biolegend       | Cat: 348801; RRID: AB_10612570    |
| Anti-CD303         | Thermo Fisher   | Cat: 25-9818-42; RRID: AB_2573552 |
| Anti-CD11c         | TonboBio        | Cat: 20-0116; RRID: AB_2621558    |
| Anti-CD7           | BD Biosciences  | Cat: 563845; RRID: AB_2738448     |
| Anti-CD56          | BD Biosciences  | Cat: 612766; RRID: AB_2813880     |
| Anti-CD122         | BD Biosciences  | Cat: 562887; RRID: AB_2737866     |
| Anti-CD11b         | BD Biosciences  | Cat: 562721; RRID: AB_2737745     |
| Anti-CD161         | Biolegend       | Cat: 339930; RRID: AB_2563968     |
| Anti-CD57          | Biolegend       | Cat: 359622; RRID: AB_2565930     |
| Anti-NKG2A         | Beckman Coulter | Cat: IM3291U; RRID: AB_10643228   |
| Anti-CD3 (NK only) | BD Biosciences  | Cat: 557851; RRID: AB_557851      |
| Anti-CD4 (NK only) | BD Biosciences  | Cat: 557852; RRID: AB_396897      |
| Anti-CD14          | BD Biosciences  | Cat: BD557742; RRID: AB_396848    |
| Anti-CD19          | BD Biosciences  | Cat: BD557835; RRID: AB_396893    |
| Anti-Siglec7       | Biolegend       | Cat: BL339206; RRID: AB_2565239   |
| Anti-CD3           | BD Biosciences  | Cat:BD564001; RRID: AB_2744382    |
| Anti-CD4           | BD Biosciences  | Cat:BD612936; RRID: AB_2870220    |
| Anti-CD38          | BD Biosciences  | Cat:BD562444; RRID: AB_11151894   |
| Anti-PD1           | BD Biosciences  | Cat:BD563245; RRID: AB_2738091    |
| Anti-CD197 (CCR7)  | Biolegend       | Cat:353230; RRID: AB_2563630      |
| Anti-CD45RA        | BD Biosciences  | Cat:BD555488; RRID: AB_395879     |
| Anti-CD69          | Biolegend       | Cat:BL310910; RRID: AB_314845     |
| Anti-CD8           | BD Biosciences  | Cat:BD565192; RRID: AB_2739104    |
